# Supplementary material for: Exceptional running and turning performance in a mite
Source: Oxford University Press journal article supplement (doi:10.1242/jeb.128652), 2016-01-01
Supplement: jeb128652supp.pdf [file jeb128652supp.pdf]

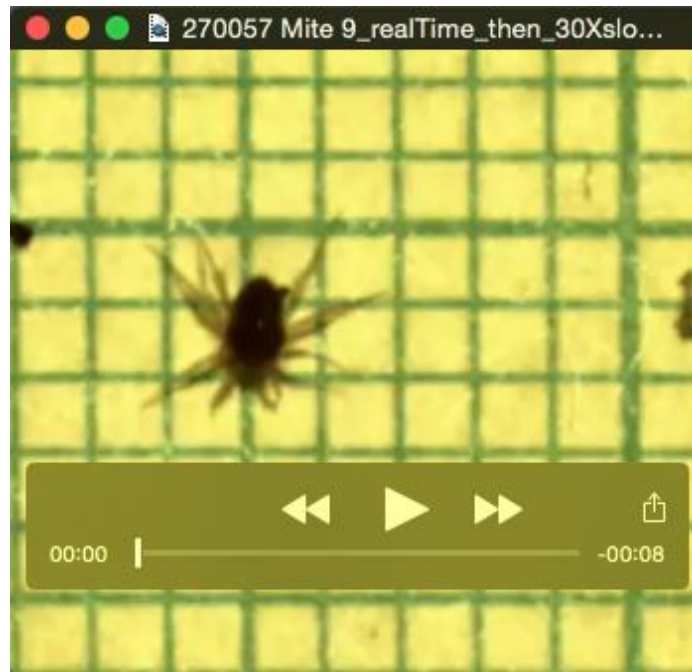

**Movie 1.** Pivot turn movie. Footage of *P. macropalpis* executing a pivot turn, initially in real-time and then slowed 1/30.

**Table S1.** Relative speed and mass data for fast-running animals included in Fig. 7

| Species                           | $v_r$<br>(BL s <sup>-1</sup> ) | $M_b$<br>(g) | References                               |
|-----------------------------------|--------------------------------|--------------|------------------------------------------|
| Arthropoda                        |                                |              |                                          |
| Arachnida                         |                                |              |                                          |
| Araneae                           |                                |              |                                          |
| <i>Argiope aurantia</i>           | 15.0                           | 0.86         | Foellmer et al., 2011                    |
| <i>Dolomedes plantarius</i>       | 37.5                           | 1            | Gorb and Barth, 1994 <sup>M</sup>        |
| <i>Hololena adnexa</i>            | 24                             | 0.1          | Spagna et al., 2011 <sup>M</sup>         |
| <i>Hololena adnexa</i>            | 79                             | 0.1          |                                          |
| <i>Eratigena atrica</i>           | 28.6                           | 0.5          | Guinness Book                            |
| <i>Schizocosa ocreata</i>         | 75                             | 0.05         | Amaya et al., 2001 <sup>L</sup>          |
| Solifugae                         |                                |              |                                          |
| <i>Eremobates marathoni</i>       | 9.9                            | 9.9          | Punzo, 1998                              |
| Acari                             |                                |              |                                          |
| <i>Paratarsotomus macropalpis</i> | 154                            | 0.00025      | Current study                            |
|                                   | 214.6                          | 0.000025     |                                          |
| Insecta                           |                                |              |                                          |
| <i>Formica polyctena</i>          | 26                             | 0.021        | Hurlbert et al., 2008                    |
| <i>Cataglyphis bombycina</i>      | 74                             | 0.01         | Wehner, 1983;<br>Wittlinger et al., 2007 |
| <i>Periplaneta americana</i>      | 50                             | 0.83         | Full and Tu, 1991                        |
| <i>Onymacris plana</i>            | 50                             | 1.3          | Nicolson, Bartholemew and Seeley, 1984   |
| <i>Cicindela eburneola</i>        | 171                            | 0.05         | Kamoun and Hogenhout, 1996               |
| Myriapoda - Chilopoda             |                                |              |                                          |
| <i>Scutigera coleoptrata</i>      | 19.1                           | 0.1          | Manton, 1965                             |
| Crustacea                         |                                |              |                                          |
| <i>Ocypode centrophthalma</i>     | 100                            | 12           | Burrows and Hoyle, 1973                  |
| Reptilia                          |                                |              |                                          |
| <i>Callosaurus draconoides</i>    | 55.3                           | 9.5          | Irschick and Jayne, 1999                 |
| <i>Cnemidophorus tigris</i>       | 37.6                           | 17.3         |                                          |
| <i>Varanus gouldi</i>             | 18.6                           | 429          | Clemente et al., 2009                    |
| <i>Varanus giganteus</i>          | 12.9                           | 2970         |                                          |
| Mammalia                          |                                |              |                                          |
| <i>Gazella thompsoni</i>          | 24.2                           | 20,500       |                                          |
| <i>Procapra gutturosa</i>         | 17.8                           | 30,000       | See Iriate-Díaz, 2002                    |
| <i>Canis latrans</i>              | 20.1                           | 13,300       |                                          |
| <i>Vulpes fulva</i>               | 28.7                           | 4800         |                                          |
| <i>Acinonyx jubatus</i>           | 15                             | 20,000       |                                          |
| <i>Sciurus carolinensis</i>       | 31.0                           | 500          |                                          |
|                                   | 30.2                           | 76           |                                          |
| <i>Ammospermophilus leucurus</i>  |                                |              |                                          |

| Species                         | $v_r$ | $M_b$   | References |
|---------------------------------|-------|---------|------------|
| <i>Neotoma lepida</i>           | 24.3  | 1100    |            |
| <i>Mus musculus</i>             | 43.9  | 16      |            |
| <i>Perognathus longimenbris</i> | 39.3  | 8.9     |            |
| <i>Lepus europeus</i>           | 37.1  | 4000    |            |
| (larger mammals, >35 kg)        |       |         |            |
| <i>Homo sapiens</i>             | 5     | 85,000  |            |
| <i>Equus zebra</i>              | 7.4   | 300,000 |            |
| <i>Equus burchelli</i>          | 8.2   | 235,000 |            |
| <i>Bison bison</i>              | 5.4   | 865,000 |            |
| <i>Cervus elephas</i>           | 9.0   | 300,000 |            |
| <i>Rangifera tarandus</i>       | 12.7  | 100,000 |            |
| <i>Gazella granti</i>           | 16.7  | 62,500  |            |
| <i>Antilocapra americana</i>    | 21.6  | 50,000  |            |
| <i>Antilope cervicapra</i>      | 23.6  | 37,500  |            |
| <i>Canis lupus</i>              | 14.1  | 35,200  |            |
| <i>Panthera tigris</i>          | 7.2   | 161,000 |            |
| <i>Panthera leo</i>             | 8.2   | 156,000 |            |
| <i>Crocota crocuta</i>          | 13.5  | 52,000  |            |

<sup>M</sup>, Mass estimated from other literature.

<sup>L</sup>, Length estimated from other literature.
